# Supplementary material
Source: PubMed Central journal article supplement (PMC3887854)
Supplement: molcell-35-1-70-10-supplementary.pdf [file molcell-35-1-70-10-supplementary.pdf]

## SUPPLEMENTARY MATERIALS

### **SUMO modification of NZFP mediates transcriptional repression through TBP binding**

Mijin Kim<sup>a,§</sup>, Zifan Chen<sup>a,§</sup>, Myoung Sup Shim<sup>a</sup>, Myoung Sook Lee<sup>a</sup>, Ji Eon Kim<sup>a</sup>, Young Eun Kwon<sup>a</sup>, Taek Jin Yoo<sup>a</sup>, Jin Young Kim<sup>a</sup>, Jeyoung Bang<sup>b</sup>, Bradley A. Carlson<sup>c</sup>, Jae Hong Seol<sup>a</sup>, Dolph L. Hatfield<sup>c</sup> and Byeong Jae Lee<sup>a,b,\*</sup>

<sup>a</sup>School of Biological Sciences, Institute of Molecular Biology and Genetics, <sup>b</sup>Interdisciplinary Program of Bioinformatics, Seoul National University, Seoul 151-742, Korea

<sup>c</sup>Molecular Biology of Selenium Section, Laboratory of Cancer Prevention, Center for Cancer Research, National Cancer Institute, National Institutes of Health, Bethesda, MD 20892, USA

\*To whom correspondence should be addressed: Byeong Jae Lee, School of Biological Sciences, Institute of Molecular Biology and Genetics, Seoul National University, Seoul 151-742, Korea, Tel: +82-2-880-6775; Fax: +82-2-872-9019; E-mail: [imbglmg@snu.ac.kr](mailto:imbglmg@snu.ac.kr)

<sup>§</sup>These authors contributed equally to this study.

**Table S1.** Primers used for this experiments

| Name                                                      |         | Sequence (5'→3')                                    |
|-----------------------------------------------------------|---------|-----------------------------------------------------|
| <b>( for SUMO modification site mutant construction )</b> |         |                                                     |
| K123R-F                                                   | forward | GAAGGGATAAGAGAGGAGCC                                |
| K123R-R                                                   | reverse | GGCTCCTCTCTATCCCTTC                                 |
| K187R-F                                                   | forward | CAATGGGATTAGAGAGGAAG                                |
| K187R-R                                                   | reverse | CTTCCTCTCTAATCCCATTG                                |
| K233R-F                                                   | forward | GAATTATATAAGAGAGGAGGTT                              |
| K233R-R                                                   | reverse | AACCTCCTCTCTATATAATTC                               |
| <b>( for expression assay constructs )</b>                |         |                                                     |
| Gal4-F                                                    | forward | GGATCCAAGCTTGCCACCATGAAGCTACTGTCTTCTAT              |
| Gal4-R                                                    | reverse | AAGCTTGATCCCGGCGGAATTCCGGCGATACAG                   |
| VP16-F                                                    | forward | GGTACCGGATCCACCATGAAAGCGCCCCCGACCGATGT              |
| VP16-R( <i>XhoI</i> )                                     | reverse | GGTACCCTCGAGCCCACCGTACTCGTCAAT                      |
| VP16-R( <i>BamHI</i> )                                    | reverse | GGTACCGGATCCCCACCGTACTCGTCAAT                       |
| <b>( for immunoprecipitation assay constructs )</b>       |         |                                                     |
| HA-TBP-F                                                  | forward | GGATAGGTACCATGATGTACCCATACGATGTTCCAGATTACGCTATGGATC |
| HA-TBP-R                                                  | reverse | GACTCTAGATCTTTACGTCGTCTTCC                          |

**Supplementary Fig. S1.** NZFP interacts with the ubiquitin-like E2 conjugating enzyme, Ubc9.

(A) Identification of a clone encoding a protein that interacts with NZFP in yeast. Clone #3 which had been screened on a His deficient medium was streaked on minimal medium and  $\beta$ -galactosidase activity was detected through X-gal staining. Yeast cells expressing SNF1/SNF4 were used as a positive control and cells containing pGAD10 and pBAH-NZFP were used as a negative control. (B) *In vitro* interaction of *Xenopus* Ubc9 with NZFP. The *in vitro* pull-down assay was performed by using a GST-Ubc9 fusion protein and *in vitro* translated [<sup>35</sup>S]-labeled NZFP. Input designates the *in vitro* translated NZFP used for assay. Bound NZFP is indicated by an arrow.

**Supplementary Fig. S2.** SENP1/2 mediates desumoylation of NZFP.

(A) Samples from 293T cells transfected with the expression vectors for NZFP-Flag, EGFP-SUMO1 and Myc-SENP, separately or together as described (+/-) were immunoprecipitated with anti-Flag antibody and the bound proteins were analyzed by western blotting using anti-GFP antibody as the primary antibody. SENP (desumoylating proteins) expressing vectors were added in lanes 4 to 6. (1, 2, and 2m designate SENP1, SENP2, and SENP2 mutant, respectively). Samples from above lysates were also tested for the expression of NZFP, SENP, and  $\beta$ -Actin by western blotting using anti-Flag, anti-Myc, and anti- $\beta$ -Actin antibodies, respectively. (B) Experiments were performed as the same as given in (A) using the expression vectors for NZFP-Flag, Myc-SENPs, Flag-Ubc9, and His-SUMO1.

Figure S1

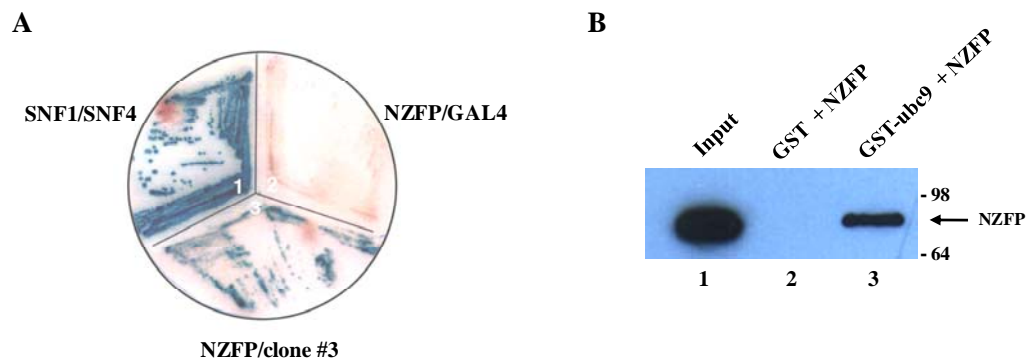

Figure S2

**A**

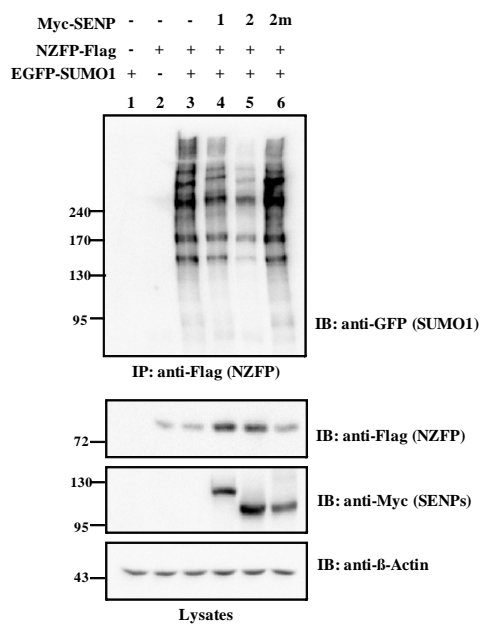

**B**

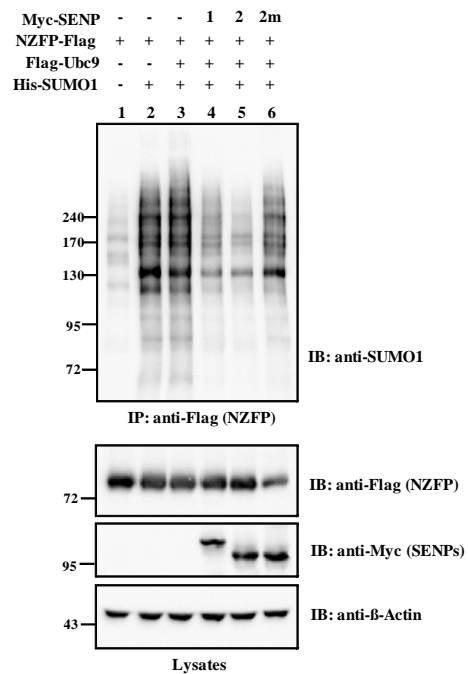

# Review only

western :  $\alpha$ -Flag

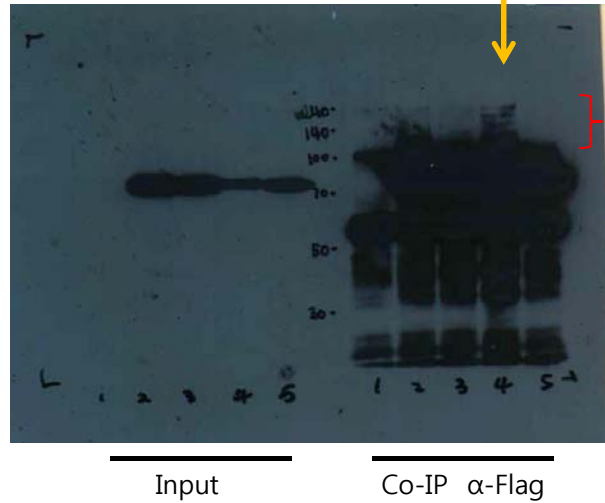

Exposure time : 1 minute

- 1 : HA-TBP single transfection
- 2 : Flag-NZFP single transfection
- 3 : Flag-3P single transfection
- 4 : Flag-NZFP + HA-TBP Co-T
- 5 : Flag-3P + HA-TBP Co-T
